# Supplementary material
Source: publisher figshare collection journal article supplement (https://acs.figshare.com/ndownloader/files/5216854)
Supplement: Supplementary file 1 [file 5216854]

## Supporting information

### **Regio- and Stereospecific Synthesis of Novel 3-Enynyl Substituted Thioflavones / Flavones Using a Copper free Palladium-Catalyzed Reaction**

Manojit Pal\*, Rambabu Dakarapu, Karuppasamy Parasuraman,  
Venkataraman Subramanian, Koteswar Rao Yeleswarapu

*Chemistry-Discovery Research, Dr. Reddy's Laboratories Ltd., Bollaram Road, Miyapur,  
Hyderabad 500049, India*

### **Table of contents**

|                                                            |                     |
|------------------------------------------------------------|---------------------|
| <b>Experimental section -----</b>                          | <b>Page no. S2</b>  |
| <b>General methods -----</b>                               | <b>Page no. S2</b>  |
| <b>General procedure for the preparation of IV: -----</b>  | <b>Page no. S2</b>  |
| <b>General procedure for the preparation of III: -----</b> | <b>Page no. S14</b> |

## Experimental Section:

### General methods

Unless stated otherwise, reactions were performed under nitrogen atmosphere. Reactions were monitored by thin layer chromatography (TLC) on silica gel plates (60 F254), visualizing with ultraviolet light or iodine spray. Flash chromatography was performed on silica gel (230-400 mesh) using distilled petroleum ether, ethyl acetate, dichloromethane, chloroform and methanol.  $^1\text{H}$  NMR and  $^{13}\text{C}$  NMR spectra were determined in  $\text{CDCl}_3$ ,  $\text{DMSO-}d_6$  or  $\text{MeOH-}d_4$  solution on 200 and 50 MHz spectrometers, respectively. Proton chemical shifts ( $\delta$ ) are relative to tetramethylsilane (TMS,  $\delta = 0.00$ ) as internal standard and expressed in ppm. Spin multiplicities are given as s (singlet), d (doublet), t (triplet) and m (multiplet) as well as b (broad). Coupling constants ( $J$ ) are given in hertz. Infrared spectra were recorded on a FT-IR spectrometer. Melting points were determined by using melting point apparatus and are uncorrected. Thermal analysis data [Differential Scanning Calorimetry (DSC)] was generated with the help of DSC-50 detector. MS spectra were obtained on a mass spectrometer. Chromatographic purity by HPLC was determined by using area normalization method and the condition specified in each case: column, mobile phase (range used), flow rate, detection wavelength, and retention times. Microanalyses were performed using a C H N S/O analyzer.

### General procedure for the preparation of IV:

A mixture of **I** (2 mmol),  $(\text{PPh}_3)_2\text{PdCl}_2$  (0.08-0.10 mmol) and triethylamine (16 mmol) in DMF (4 mL) was stirred at 80 °C for 1 h under a nitrogen atmosphere. The mixture was then cooled to room temperature and the acetylenic compound **II** (4 mmol) dissolved in DMF (1.0 mL) were added slowly with stirring. The reaction mixture was stirred at 25 °C for 2 h and then an additional quantity of acetylenic compound **II** (2 mmol) dissolved in DMF (1.0 mL) was added with stirring. Stirring was continued for 12-15 h under a nitrogen atmosphere and the mixture was poured into cold 2N HCl solution with stirring. The mixture was then extracted with EtOAc (3 x 200 mL), the combined organic layers were washed with cold water (2 x 100 mL), then dried over  $\text{Na}_2\text{SO}_4$ , filtered and concentrated under vacuum. The residue was purified by column chromatography (petroleum ether-EtOAc) to afford the desired product.

**3-[(E)-5-Hydroxy-2-(1-hydroxy-1-methylethyl)-5-methyl-1-hexen-3-ynyl]-2-phenyl thiochromen-4-one (IVa)**

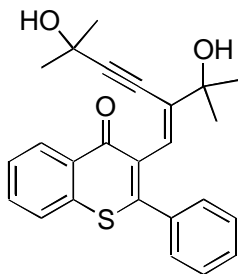

**IVa** was isolated as brown solid; DSC: 180.8 °C; <sup>1</sup>H NMR (400 MHz, CDCl<sub>3</sub>): 8.49 (d, *J* = 8.2 Hz, 1H), 7.63-7.59 (m, 2H), 7.58-7.48 (m, 3H), 7.39-7.36 (m, 3H), 6.83 (s, 1H), 3.11 (bs, D<sub>2</sub>O exchangeable, 1H), 3.02 (bs, D<sub>2</sub>O exchangeable, 1H), 1.36 (s, 6H), 1.15 (s, 6H); IR (KBr, cm<sup>-1</sup>): 3384 (bs, OH), 3301, 2926, 1605 (C=O), 1580, 1526; MS (CI, i-Butane): 405.5 (M<sup>+</sup>+1, 100%); <sup>13</sup>C-NMR (50 MHz, DMSO-*d*<sub>6</sub>): 179.1, 149.6, 136.9 (2C), 135.3, 132.0, 131.8, 130.2, 129.4 (2C), 128.3 (2C), 128.1 (2C), 128.0, 126.8, 126.6, 101.7, 78.7, 71.9, 63.6, 31.5 (2C), 29.1 (2C); UV (MeOH, nm): 260, 206.5; HPLC: 98.5%, Hichrom RPB (250 x 4.6 mm), mobile phase 0.01M KH<sub>2</sub>PO<sub>4</sub>: CH<sub>3</sub>CN, (T/%B) 0/20, 10/20 40/85, 50/85, 60/20, 65/20, 1.0 mL / min, 260 nm, retention time 30.53 min.; Elemental analysis found C, 74.33; H, 5.97; C<sub>25</sub>H<sub>24</sub>O<sub>3</sub>S requires C, 74.23; H, 5.98 %.

**3-[(E)-5-Hydroxy-2-(1-hydroxyethyl)-1-hexen-3-ynyl]-2-phenyl thiochromen-4-one (IVb)**

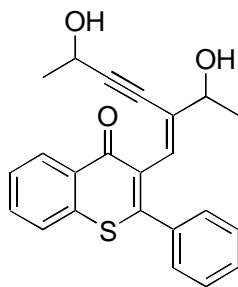

**IVb** was isolated as pale yellow solid; DSC: 146.39 °C; <sup>1</sup>H NMR (400 MHz, CDCl<sub>3</sub>): 8.53 (d, *J* = 7.8 Hz, 1H), 7.62-7.53 (m, 4H), 7.49-7.46 (m, 2H), 7.42-7.38 (m, 2H), 6.74 (s, 1H), 4.49-4.44 (m, 1H), 4.30-4.26 (m, 1H), 1.78-1.58 (bs, D<sub>2</sub>O exchangeable, 2H), 1.30-1.26 (m, 3H), 1.12-1.09 (m, 3H); IR (KBr, cm<sup>-1</sup>): 3432 (bs, OH), 2927, 1608 (C=O), 1578, 1529, 1441; MS (CI, i-Butane): 377 (M<sup>+</sup>+1, 100%); <sup>13</sup>C-NMR (50 MHz, DMSO-

*d*<sub>6</sub>): 178.9, 149.8, 136.8, 136.7, 131.9, 131.9, 130.8, 129.8, 129.3, 129.1 (2C), 128.1, 128.0 (2C), 127.9, 127.6, 126.4, 99.1, 79.6, 68.6, 56.6, 24.4, 22.5; UV (MeOH, nm) 349.4, 258.6, 212.4; HPLC: 99%. INERTSIL ODS 3V (250 x 4.6 mm), mobile phase 0.01M KH<sub>2</sub>PO<sub>4</sub>: CH<sub>3</sub>CN (1:1), 1.0 mL / min, 255 nm, retention time 10.05 min.; Elemental analysis found C, 73.40; H, 5.34; C<sub>23</sub>H<sub>20</sub>O<sub>3</sub>S requires C, 73.38; H, 5.35 %.

**3-[(*E*)-5-Hydroxy-2-hydroxymethyl-1-penten-3-ynyl]-2-phenyl thiochromen-4-one (IVc)**

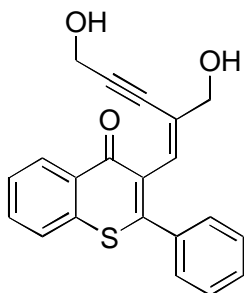

**IVc** was isolated as brown solid; DSC: 182 °C; <sup>1</sup>H NMR (200 MHz, DMSO-*d*<sub>6</sub>): 8.37 (d, *J* = 7.5 Hz, 1H), 7.92-7.47 (m, 8H), 6.80 (s, 1H), 5.25 (bs, D<sub>2</sub>O exchangeable, 1H), 5.09 (bs, D<sub>2</sub>O exchangeable, 1H), 4.02-4.0 (m, 2H), 3.77 (m, 2H); IR (KBr, cm<sup>-1</sup>): 3314 (bs, OH), 2924, 1608 (C=O), 1588; MS (CI, *i*-Butane): 349 (M<sup>+</sup>+1, 100 %); UV (MeOH, nm) 349, 259, 207.4; HPLC: 97%. INERTSIL ODS 3V (250 mm), 0.01M KH<sub>2</sub>PO<sub>4</sub>: CH<sub>3</sub>CN (1:1), 1.0 mL / min, 260 nm, retention time 7.752 min; Elemental analysis found C, 72.35; H, 4.64; C<sub>21</sub>H<sub>16</sub>O<sub>3</sub>S requires C, 72.39; H, 4.63 %.

**3-[(*Z*)-6-Hydroxy-2-(2-hydroxyethyl)-1-hexen-3-ynyl]-2-phenyl thiochromen-4-one (IVd)**

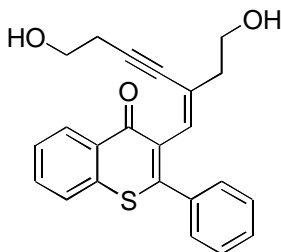

**IVd** was isolated as brown gum; <sup>1</sup>H NMR (400 MHz, CDCl<sub>3</sub>): 8.57 (d, *J* = 7.8 Hz, 1H), 7.69-7.43 (m, 8H), 6.35 (s, 1H), 3.67 (t, *J* = 5.9 Hz, 2H), 3.55 (t, *J* = 5.9 Hz, 2H), 2.43 (t,

$J = 6.4$  Hz, 2H), 2.38 (t,  $J = 6.4$  Hz, 2H), 2.33-2.04 (bs, D<sub>2</sub>O exchangeable, 2H); IR (Neat, cm<sup>-1</sup>): 3391 (bs, OH), 2926, 2231, 1606 (C=O), 1587; MS (CI, i-Butane): 377 (M<sup>+</sup>+1, 100%); <sup>13</sup>C NMR (50 MHz, DMSO-*d*<sub>6</sub>): 178.9, 136.9, 136.6, 131.9, 131.6, 131.4, 130.8, 130.7, 129.9, 129.5, 128.9, 128.6, 128.2, 128.1, 127.9, 126.4, 124.1, 93.1, 80.1, 59.7 (2C), 40.8, 23.4; Elemental analysis found C, 73.41; H, 5.34; C<sub>23</sub>H<sub>20</sub>O<sub>3</sub>S requires C, 73.38; H, 5.35 %.

**3-[(*E*)-5-Hydroxy-2-(1-hydroxypropyl)-1-hepten-3-ynyl]-2-phenyl thiochromen-4-one (IVe)**

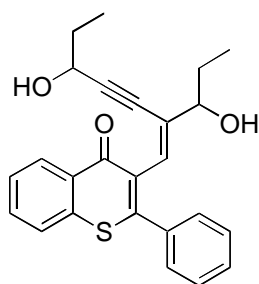

**IVe** was isolated as brown solid; DSC: 210.19 °C; <sup>1</sup>H NMR (400 MHz, CDCl<sub>3</sub>): 8.52 (d,  $J = 8.3$  Hz, 1H), 7.61-7.51 (m, 3H), 7.48-7.38 (m, 5H), 6.66 (d,  $J = 2.9$  Hz, 1H), 4.26 (t,  $J = 6.4$  Hz, 1H), 4.02 (t,  $J = 6.4$  Hz, 1H), 2.98-2.65 (bs, D<sub>2</sub>O exchangeable, 2H), 1.59-1.45 (m, 4H), 0.81-0.70 (m, 3H), 0.69-0.65 (m, 3H); IR (KBr, cm<sup>-1</sup>): 3384 (bs, OH), 2930, 1605 (C=O), 1585; MS (CI, i-Butane): 405 (M<sup>+</sup>+1, 100 %); <sup>13</sup>C NMR (50 MHz, CDCl<sub>3</sub>): 178.9, 149.7, 136.8 (2C), 136.7, 131.9, 131.6, 131.3, 131.1, 130.0, 129.4, 128.9 (2C), 128.6, 128.2, 127.9, 126.3, 97.8, 80.6, 73.7, 62.1, 30.6, 28.5, 9.4, 9.1; Elemental analysis found C, 74.43; H, 5.97; C<sub>25</sub>H<sub>24</sub>O<sub>3</sub>S requires C, 74.23; H, 5.98 %.

**3-[(*E*)-5-Hydroxy-2-(hydroxyphenylmethyl)-5-phenyl-1-penten-3-ynyl]-2-phenyl thiochromen-4-one (IVf)**

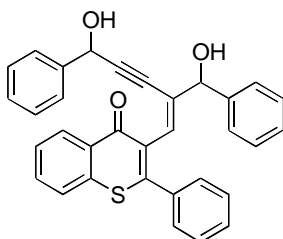

**IVf** was isolated as pale brown solid; DSC: 221.3 °C; <sup>1</sup>H NMR (400 MHz, CDCl<sub>3</sub>): 8.50-8.48 (m, 1H), 7.65-7.52 (m, 3H), 7.33-7.29 (m, 3H), 7.26-7.1 (m, 8H), 7.09-7.04 (m, 4H), 6.93 (s, 1H), 5.29-5.25 (m, 2H), 3.45-2.62 (bs, D<sub>2</sub>O exchangeable, 2H); IR (KBr, cm<sup>-1</sup>): 3335 (bs, OH), 2925, 1616 (C=O), 1534, 1444; MS (CI, i-Butane): 501 (M<sup>+</sup>+1, 100%); <sup>13</sup>C-NMR (50 MHz, DMSO-*d*<sub>6</sub>): 178.8, 150.1, 142.6, 141.7, 136.8, 136.6, 131.9, 130.8, 130.4, 130.0 (2C), 129.2, 128.8 (2C), 128.3 (2C), 127.9, 127.7 (5C), 127.2, 126.9 (2C), 126.9, 126.4, 126.3 (2C), 96.8, 82.1, 74.7, 62.7; Elemental analysis found C, 79.15; H, 4.85; C<sub>33</sub>H<sub>24</sub>O<sub>3</sub>S requires C, 79.17; H, 4.83 %.

**3-[(*E*)-5-(4-Formylphenoxy)-2-(4-formylphoxymethyl)pent-1-en-3-ynyl]-2-phenyl thiochromen-4-one (IVg)**

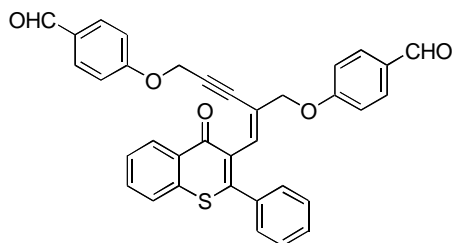

**IVg** was isolated as pale yellow solid; mp > 250 °C; <sup>1</sup>H NMR (200 MHz, CDCl<sub>3</sub>): 9.89 (s, 1H, -CHO), 9.65 (s, 1H, -CHO), 8.48 (d, *J* = 7.8 Hz, 1H), 7.78 (d, *J* = 8.3 Hz, 2H), 7.63-7.26 (m, 14H), 6.91-6.86 (m, 1H), 4.75 (s, 2H), 4.55 (s, 2H); IR (KBr, cm<sup>-1</sup>): 2926, 2120 (w, -C≡C-), 1690 (C=O), 1599, 1508, 1222; MS (CI, i-Butane): 557 (M<sup>+</sup>+1, 100%). <sup>13</sup>C-NMR (50 MHz, DMSO-*d*<sub>6</sub>): 191.3, 190.9, 178.4, 162.7, 161.8, 151.0, 136.6, 136.3, 135.3, 132.1, 131.7 (2C), 131.2 (2C), 129.9, 129.8, 129.6, 129.3, 128.9, 128.7 (2C), 128.3 (2C), 128.1, 128.1, 126.5, 121.5, 115.2 (2C), 114.9 (2C), 89.8, 83.9, 69.5, 56.1; Elemental analysis found C, 75.50; H, 4.36; C<sub>35</sub>H<sub>24</sub>O<sub>5</sub>S requires C, 75.52; H, 4.35 %.

**3-[(*E*)-5-(4-Methoxyphenoxy)-2-(4-methoxy phoxymethyl)pent-1-en-3-ynyl]-2-phenyl thiochromen-4-one (IVh):**

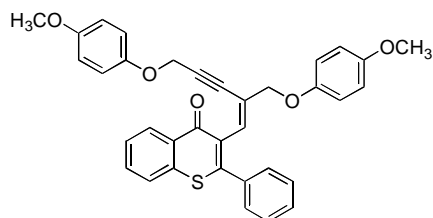

**IVh** was isolated as light brown low melting solid;  $^1\text{H}$  NMR (400 MHz,  $\text{CDCl}_3$ )  $\delta$  8.52 (d,  $J = 7.8$  Hz, 1H), 7.62 (t,  $J = 6.7$  Hz, 1H), 7.53 (d,  $J = 6.7$  Hz, 2H), 7.4-7.32 (m, 7H), 6.90 (s, 1H), 6.79-6.68 (m, 4H), 6.58 (d,  $J = 4.6$  Hz, 2H), 4.72 (s, 2H), 4.40 (s, 2H), 3.77 (s, 3H), 3.65 (s, 3H); IR (KBr,  $\text{cm}^{-1}$ ) 1614 (C=O), 1591;  $m/z$  (CI, *i*-Butane) 561 (M+1, 100%);  $^{13}\text{C}$  NMR (50 MHz,  $\text{CDCl}_3$ )  $\delta$  178.6, 153.5, 153.4, 151.7, 150.8, 136.6, 136.2, 131.9, 130.9, 129.7, 129.2, 128.9, 128.3, 128.1, 127.6, 127.5, 126.9, 125.3 (2C), 125.0, 122.4, 116.2 (2C), 115.3 (2C), 113.8 (2C), 113.6 (2C), 90.2, 82.9, 69.8, 56.4, 54.9, 54.7; HPLC: 98.5%, ACE 3C18 (150 x 4.6 mm), mobile phase 0.01M  $\text{KH}_2\text{PO}_4$  (pH-5.5) :  $\text{CH}_3\text{CN}$  70:30, (T/%B) 0/75, 5/75, 15/80, 40/80, 45/75, 50/75. 0.5 mL/min, retention time 11.42 min, VU: 210; Elemental analysis found C, 74.95; H, 5.04;  $\text{C}_{35}\text{H}_{28}\text{O}_5\text{S}$  requires C, 74.98; H, 5.03 %.

**3-[(*E*)-5-(4-Nitrophenoxy)-2-(4-nitrophoxymethyl)pent-1-en-3-ynyl]-2-phenylthiochromen-4-one (IVi)**

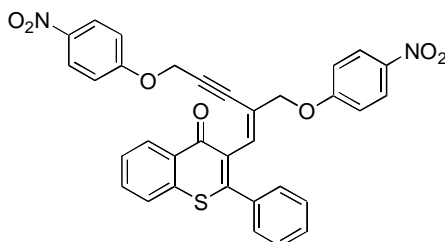

**IVi** was isolated as yellow solid, DSC 125.45  $^\circ\text{C}$ ;  $^1\text{H}$  NMR (400 MHz,  $\text{DMSO}-d_6$ )  $\delta$  8.26 (d,  $J = 7.5$  Hz, 1H), 8.14-8.11 (m, 2H), 7.86-7.84 (m, 2H), 7.77-7.58 (m, 2H), 7.62-7.58 (m, 2H), 7.45-7.36 (m, 6H), 7.02 (t,  $J = 9.2$  Hz, 1H), 7.0 (s, 1H), 6.95 (d,  $J = 9.4$  Hz, 1H), 4.99 (s, 2H), 4.68 (s, 2H); IR (KBr,  $\text{cm}^{-1}$ ) 1606 (C=O), 1585;  $m/z$  (CI, *i*-Butane) 591 (M+1, 100%);  $^{13}\text{C}$  NMR (50 MHz,  $\text{CDCl}_3$ )  $\delta$  178.8, 162.9, 162.0, 151.9, 141.7, 141.6, 136.9, 136.3, 134.7, 131.7 (2C), 130.1 (2C), 129.8, 129.4, 128.9, 128.7, 128.3 (2C), 127.8, 125.7, 125.6 (2C), 125.3, 121.5, 114.8 (2C), 114.5 (2C), 89.0, 84.7, 69.9, 56.7; HPLC: 97.1%, HICHROMR PB (250 x 4.6 mm), 0.01M  $\text{KH}_2\text{PO}_4$ :  $\text{CH}_3\text{CN}$ , 70:30, (T/%B) 0/60, 5/60, 15/80, 25/80, 30/60, 35/60, 1.0 mL/min, 210 nm, retention time 17.6 min; Elemental analysis found C, 67.33; H, 3.73; N, 4.72;  $\text{C}_{33}\text{H}_{22}\text{N}_2\text{O}_7\text{S}$  requires C, 67.11; H, 3.75; N, 4.74 %.

**3-[(*E*)-5-(2-Chlorophenoxy)-2-(2-chlorophenoxyethyl)pent-1-en-3-ynyl]-2-phenylthiochromen-4-one (IVj):**

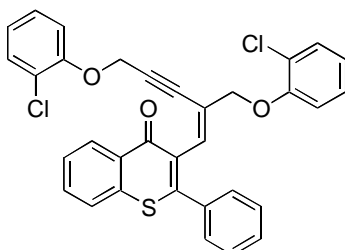

**IVj** was isolated as light brown solid, DSC 153.9 °C;  $^1\text{H}$  NMR (200 MHz,  $\text{CDCl}_3$ )  $\delta$  8.52 (d,  $J = 7.9$  Hz, 1H), 7.62 (t,  $J = 6.7$  Hz, 1H), 7.53 (d,  $J = 6.7$  Hz, 2H), 7.4-7.32 (m, 7H), 6.90 (s, 1H), 6.79-6.68 (m, 4H), 6.58 (d,  $J = 4.6$  Hz, 2H), 4.72 (s, 2H), 4.40 (s, 2H); IR (KBr,  $\text{cm}^{-1}$ ) 1607 (C=O);  $m/z$  (CI, *i*-Butane) 570 (M+1, 100%);  $^{13}\text{C}$  NMR (50 MHz,  $\text{CDCl}_3$ )  $\delta$  179.4, 153.7, 152.8, 151.8, 137.4, 136.6, 133.3, 131.3, 130.4, 130.2, 130.0, 129.6, 129.5, 129.0, 128.9, 128.2, 127.6 (2C), 127.5, 127.2 (2C), 125.7, 123.1, 122.7, 121.9, 121.9 (2C), 121.7, 114.1, 89.7, 84.3, 70.3, 57.1; HPLC: 98.1%, prevail C18, 0.01M  $\text{KH}_2\text{PO}_4$  : $\text{CH}_3\text{CN}$ , (T/%B) 0/50, 1/50, 10/85, 16/85, 18/50, 20/50, 2.5 mL/min, 210 nm, retention time 10.2 min; Elemental analysis found C, 69.69; H, 3.87;  $\text{C}_{33}\text{H}_{22}\text{Cl}_2\text{O}_3\text{S}$  requires C, 69.60; H, 3.89 %.

**2-Phenyl-3-[(*E*)-5-*o*-tolylloxy-2-*o*-tolylloxymethylpent-1-en-3-ynyl]thiochromen-4-one (IVk):**

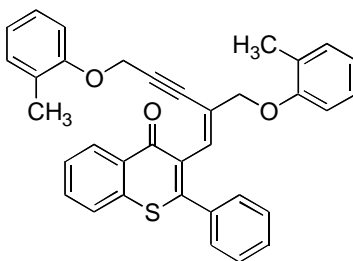

**IVk** was isolated as light brown powder; DSC 146.03 °C;  $^1\text{H}$  NMR (400 MHz,  $\text{CDCl}_3$ )  $\delta$  8.52 (d,  $J = 4.3$  Hz, 1H), 7.63 (t,  $J = 6.9$  Hz, 1H), 7.60 (t,  $J = 5.4$  Hz, 2H), 7.37-7.28 (m, 5H), 7.09 (d,  $J = 7.3$  Hz, 2H), 7.04 (t,  $J = 7.3$  Hz, 1H), 6.94 (s, 1H), 6.86-6.78 (m, 2H),



6.71 (t,  $J = 7.3$  Hz, 2H), 6.63 (d,  $J = 8.1$  Hz, 1H), 4.66 (s, 2H), 4.46 (s, 2H), 2.16 (s, 3H), 2.15 (s, 3H); IR (KBr,  $\text{cm}^{-1}$ ) 1606 (C=O), 1587;  $m/z$  (CI, i-Butane) 529 (M+1, 100%);  $^{13}\text{C}$  NMR (50 MHz,  $\text{CDCl}_3$ )  $\delta$  179.6, 156.4, 155.7, 151.5, 137.5, 136.8, 132.2, 131.3, 130.6, 130.0, 129.4, 129.1, 129.0, 128.7, 128.3, 128.2, 127.5, 127.0, 126.8 (2C), 126.6, 126.4 (2C), 125.7, 123.1, 120.9, 120.6, 111.6, 111.4, 90.5, 83.7, 69.5, 56.5, 16.3, 16.2; VU (MeOH, nm) 254.5, 225, 204; HPLC: 97.2%, symmetry shield RP18 (250 x 4.6 mm), mobile phase 0.01M  $\text{KH}_2\text{PO}_4$  (pH =3.0):  $\text{CH}_3\text{CN}$  70:30, (T/%B) 0/75, 5/75, 15/85, 40/85, 45/75, 50/75, 1.0 mL/min, 210 nm, retention time 18.73 min; Elemental analysis found C, 79.59; H, 5.32 ; N, ;  $\text{C}_{35}\text{H}_{28}\text{O}_3\text{S}$  requires C, 79.52; H, 5.34 %.

**3-[(*E*)-5-(3,5-Dimethoxyphenoxy)-2-(3,5-dimethoxyphenoxy)methyl]pent-1-en-3-ynyl]-2-phenyl thiochromen-4-one (IVl):**

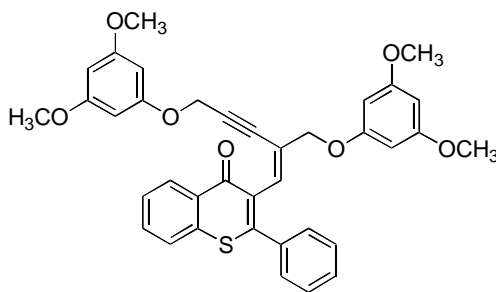

**IVl** was isolated as yellow solid; DSC 135.27 °C;  $^1\text{H}$  NMR (400 MHz,  $\text{CDCl}_3$ )  $\delta$  8.51 (d,  $J = 6.5$  Hz, 1H), 7.54 (t,  $J = 6.4$  Hz, 1H), 7.51 (t,  $J = 6.7$  Hz, 2H), 7.37-7.28 (m, 5H), 6.96 (s, 1H), 6.09-6.08 (m, 1H), 6.03-6.01 (m, 4H), 5.97-5.95 (m, 1H), 4.59 (s, 2H), 4.42 (s, 2H), 3.75 (s, 6H), 3.65 (s, 6H); IR (KBr,  $\text{cm}^{-1}$ ) 1606 (C=O);  $m/z$  (CI, i-Butane) 621 (M+1, 10%), 467 (100%);  $^{13}\text{C}$  NMR (50 MHz,  $\text{CDCl}_3$ )  $\delta$  179.5, 161.3, 161.2 (2C), 160.1 (2C), 159.4, 152.0, 137.4, 136.8, 132.6, (2C), 131.2, 130.5, 129.7, 129.5, 129.0, 128.2, 127.4 (2C), 125.7, 122.4 (2C), 93.8 (2C), 93.6 (2C), 93.5, 93.5, 90.1, 83.9, 69.5, 56.5, 55.3 (2C), 55.2 (2C); HPLC: 98.0%, Alltima C18 (53 x 7 mm), mobile phase 0.01M  $\text{KH}_2\text{PO}_4$ : $\text{CH}_3\text{CN}$  70:30, (T/%B) 0/60, 1/60, 14/85, 17/85, 19/60, 20/60, 2.5 mL/min, 225 nm, retention time 8.5 min, Elemental analysis found C, 71.70; H, 5.15;  $\text{C}_{37}\text{H}_{32}\text{O}_7\text{S}$  requires C, 71.59 ; H, 5.20 %.

**6-Chloro-3-[(E)-5-(4-methoxyphenoxy)-2-(4-methoxyphenoxyethyl)pent-1-en-3-ynyl]-2-phenyl thiochromen-4-one (IVm):**

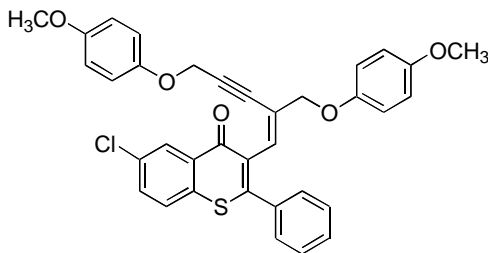

**IVm** was isolated as a light brown yield; mp 120 °C;  $^1\text{H NMR}$  (400 MHz,  $\text{CDCl}_3$ )  $\delta$  8.47 (d,  $J = 2.1$  Hz, 1H), 7.58-7.55 (m, 1H), 7.47 (d,  $J = 8.6$  Hz, 1H), 7.41-7.29 (m, 5H), 6.85 (s, 1H), 6.79-6.72 (m, 6H), 6.57 (d,  $J = 4.3$  Hz, 2H), 4.59 (s, 2H), 4.4 (s, 2H), 3.77 (s, 3H), 3.66 (s, 3H); IR (KBr,  $\text{cm}^{-1}$ ) 1615 (C=O), 1586;  $m/z$  (CI, i-Butane) 595 ( $\text{M}^+$ , 100%);  $^{13}\text{C NMR}$  (50 MHz,  $\text{CDCl}_3$ )  $\delta$  178.3, 154.0 (2C), 152.4, 151.5, 136.5, 135.5, 133.9, 131.7, 131.7, 130.0, 129.6 (2C), 129.0 (2C), 128.6 (2C), 128.2, 127.2 (2C), 123.6, 115.9 (2C), 115.8 (2C), 114.5 (2C), 114.2 (2C), 90.9, 83.8, 70.3, 57.1, 55.7, 55.5; HPLC: 97.2%, Alltima c18 (53 x 7 mm), mobile phase 0.01M  $\text{KH}_2\text{PO}_4$  :  $\text{CH}_3\text{CN}$  (T/%B) 70:30, 0/60, 1/60, 3/80, 18/80, 19/60, 20/60, 2.5 mL/min, 210 nm, retention time 6.2 min.; Elemental analysis found C, 70.59; H, 4.59  $\text{C}_{35}\text{H}_{27}\text{ClO}_5\text{S}$  requires C, 70.64 ; H, 4.57 %.

**6-Chloro-3-[(E)-5-(4-nitrophenoxy)-2-(4-nitrophenoxyethyl)pent-1-en-3-ynyl]-2-phenyl thiochromen-4-one (IVn):**

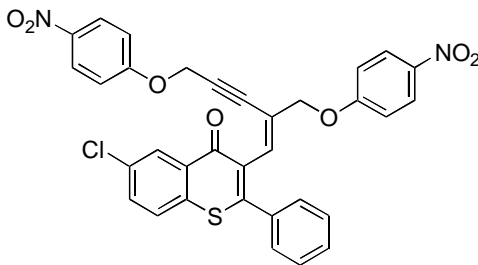

**IVn** was isolated as a light brown solid, mp 171.2 °C;  $^1\text{H NMR}$  (400 MHz,  $\text{CDCl}_3$ )  $\delta$  8.4 (s, 1H), 8.14 (d,  $J = 5.1$  Hz, 2H), 7.9 (d,  $J = 4.8$  Hz, 2H), 7.57 (d,  $J = 6.2$  Hz, 1H), 7.45-7.4 (m, 2H), 7.36-7.27 (m, 4H), 6.86-6.82 (m, 4H), 6.77 (s, 1H), 4.79 (s, 2H), 4.59 (s, 2H); IR (KBr,  $\text{cm}^{-1}$ ) 1617 (C=O), 1589;  $m/z$  (CI, i-Butane) 625 ( $\text{M}^+$ , 100%);  $^{13}\text{C NMR}$  (50 MHz,  $\text{CDCl}_3$ )  $\delta$  177.5, 162.9, 162.0, 152.0, 141.8, 141.6, 136.0, 135.0, 134.5, 134.0,

132.2, 131.3, 130.1, 129.4, 128.7, 128.6 (2C), 128.47 (2C), 127.1 (2C), 125.8, 125.4 (2C), 121.9, 114.8 (2C), 114.6 (2C), 89.4, 84.6, 69.9, 56.7; VU (MeOH, nm) 292.5, 205; HPLC: 98.9%, symmetry shield (250 x 4.6mm), mobile phase 0.01M KH<sub>2</sub>PO<sub>4</sub> (pH =7.0): CH<sub>3</sub>CN 70:30, (T/%B) 0/70, 5/70, 20/85, 30/85, 35/70, 40/70, 1.0 mL/min, 210 nm, retention time 17.9 min, Elemental analysis found C, 63.45; H, 3.40; N, 4.45; C<sub>33</sub>H<sub>21</sub>ClN<sub>2</sub>O<sub>7</sub>S requires C, 63.41; H, 3.39; N, 4.48 %.

**6-Chloro-3-[(E)-5-(2-Chlorophenoxy)-2-(2-chlorophenoxyethyl)pent-1-en-3-ynyl]-2-phenyl thiochromen-4-one (IVo):**

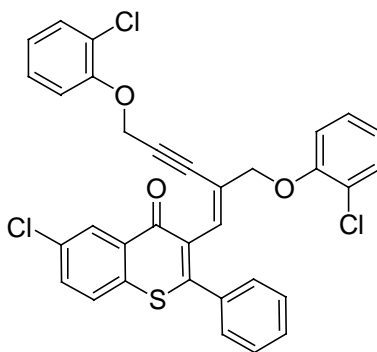

**IVo** was isolated as a light brown solid; mp 124 °C; <sup>1</sup>H NMR (400 MHz, CDCl<sub>3</sub>) δ 8.46 (s, 1H), 7.57 (d, *J* = 6.2 Hz, 1H), 7.48 (d, *J* = 8.6 Hz, 1H), 7.37-7.22 (m, 6H), 7.14 (t, *J* = 6.5 Hz, 1H), 6.95 (s, 1H), 6.91 (t, *J* = 6.5 Hz, 1H), 6.89 -6.77 (m, 3H), 6.7 (t, *J* = 5.9 Hz, 2H), 4.74 (s, 2H), 4.52 (s, 2H); IR (KBr, cm<sup>-1</sup>) 1615 (C=O); m/z (CI, i-Butane) 604 (M<sup>+</sup>, 100%); VU (MeOH, nm) 356, 264, 204; HPLC: 97.2%, Preval c18 (53 x 7 mm), mobile phase 0.01M KH<sub>2</sub>PO<sub>4</sub>: CH<sub>3</sub>CN 70:30, (T/%B) 0/60, 2/60, 4/80, 18/80, 19/60, 20/60, 2.5 mL/min, 210 nm, retention time 7.3 min, Elemental analysis found C, 65.69; H, 3.49; C<sub>33</sub>H<sub>21</sub>Cl<sub>3</sub>O<sub>3</sub>S requires C, 65.63; H, 3.50 %.

**3-[(E)-5-(4-Methoxyphenoxy)-2-(4-methoxyphenoxyethyl)pent-1-en-3-ynyl]-2-phenylchromen-4-one (IVp):**

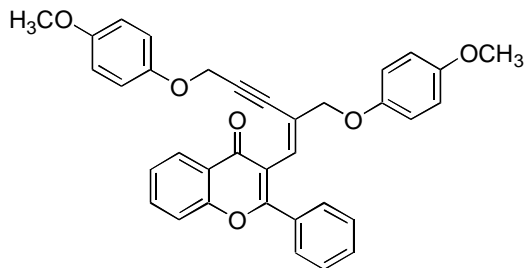

**IVp** was isolated as a light brown low melting solid,  $^1\text{H NMR}$  (400 MHz,  $\text{CDCl}_3$ )  $\delta$  8.23 (dd,  $J = 6.2, 1.6$  Hz, 1H), 7.69 (t,  $J = 6.9$  Hz, 1H), 7.67 (d,  $J = 5.6$  Hz, 2H), 7.46-7.41 (m, 3H), 7.36 (t,  $J = 7.5$  Hz, 2H), 6.92 (s, 1H), 6.82 (s, 4H), 6.71 (d,  $J = 9.1$  Hz, 2H), 6.58 (d,  $J = 9.1$  Hz, 2H), 4.53 (s, 2H), 4.51 (s, 2H), 3.77 (s, 3H), 3.65 (s, 3H); IR (KBr,  $\text{cm}^{-1}$ ) 1639 (C=O), 1616;  $m/z$  (CI, *i*-Butane) 545 ( $\text{M}^+$ , 100%);  $^{13}\text{C NMR}$  (50 MHz,  $\text{CDCl}_3$ )  $\delta$  176.7, 161.9, 155.6, 153.9, 152.2, 151.4, 133.4, 133.3, 130.3, 128.8, 128.6, 128.1, 127.9, 125.7, 124.9 (2C), 123.7, 122.6, 117.8, 117.6, 115.9, 115.7 (2C), 115.5 (2C), 114.3 (2C), 114.1 (2C), 91.2, 83.4, 70.4, 66.7, 56.9 (2C); VU (MeOH, nm) 254, 225, 204; HPLC: 98.5%, Alltima c18 (53 x 7 mm), mobile phase 0.01M  $\text{KH}_2\text{PO}_4$  :  $\text{CH}_3\text{CN}$  70:30, (T/%B) 0/60, 1/60, 14/85, 17/85, 19/60, 20/60, 2.5 mL/min, 225 nm, retention time 6.9 min, Elemental analysis found C, 77.23; H, 5.15;  $\text{C}_{35}\text{H}_{28}\text{O}_6$  requires C, 77.19; H, 5.18 %.

**2-Phenyl-3-[(*E*)-5-*o*-tolylloxy-2-*o*-tolylloxymethylpent-1-en-3-ynyl]chromen-4-one (IVq):**

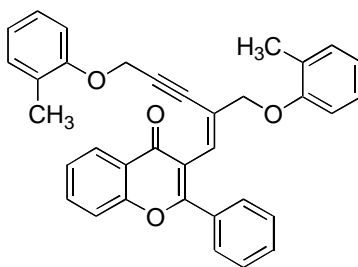

**IVq** was isolated as a light brown solid; DSC 134.9 °C;  $^1\text{H NMR}$  (400 MHz,  $\text{CDCl}_3$ )  $\delta$  8.24 (dd,  $J = 6.1, 1.7$  Hz, 1H), 7.7 (t,  $J = 5.6$  Hz, 1H), 7.54 (d,  $J = 5.1$  Hz, 2H), 7.46 (s, 1H), 7.41 (d,  $J = 6.2$  Hz, 2H), 7.32 (t,  $J = 6.2$  Hz, 2H), 7.14 -7.12 (m, 2H), 7.02 (d,  $J = 6.5$  Hz, 1H), 6.98 (s, 1H), 6.9 (t,  $J = 7.5$  Hz, 1H), 6.80-6.72 (m, 3H), 6.66 (d,  $J = 8.1$  Hz, 1H), 4.59 (s, 2H), 4.56 (s, 2H), 2.21 (s, 3H), 2.13 (s, 3H); IR (KBr,  $\text{cm}^{-1}$ ) 1629 (C=O), 1564;  $m/z$  (CI, *i*-Butane) 513 ( $\text{M}+1$ , 100%);  $^{13}\text{C NMR}$  (50 MHz,  $\text{CDCl}_3$ )  $\delta$  177.1, 162.1,

156.3, 155.9, 155.7, 133.5, 130.7, 130.5, 130.4, 128.9, 128.7, 128.2, 128.0 (2C), 127.1, 126.8, 126.6, 126.3, 126.0 (2C), 125.0, 123.6, 122.8, 120.9, 120.7, 117.9, 117.8, 111.7, 111.4, 91.1, 83.4, 69.6, 56.5, 16.3, 16.2; VU (MeOH, nm) 255, 204; HPLC: 97.5%, Alltima 3C18 (53 x 7 mm), mobile phase 0.01M KH<sub>2</sub>PO<sub>4</sub> :CH<sub>3</sub>CN, (T/%B) 0/60, 1/60, 10/85, 16/85, 18/60, 20/60, 2.5 mL/min, 215 nm, retention time 10.2 min, Elemental analysis found C, 82.15; H, 5.47; C<sub>35</sub>H<sub>28</sub>O<sub>4</sub> requires C, 82.01; H, 5.51 %.

**2-(3,4-Dimethoxyphenyl)-3-[(E)-5-hydroxy-2-(1-hydroxypropyl)-1-hepten-3-ynyl]chromen-4-one (IVr)**

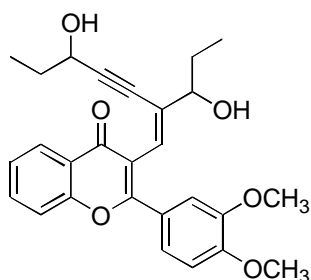

**IVr** was isolated as yellow solid, <sup>1</sup>H NMR (400 MHz, CDCl<sub>3</sub>) δ 8.24 (d, *J* = 7.8 Hz, 1H), 7.87-7.81 (m, 2H), 7.6 (t, *J* = 6.8 Hz, 1H), 7.4 (d, *J* = 8.8 Hz, 1H), 7.44 (m, 1H), 7.1 (d, *J* = 8.3 Hz, 1H), 6.65 (d, *J* = 2.9 Hz, 1H), 4.27 (t, *J* = 6.4 Hz, 1H), 4.03 (t, *J* = 6.4 Hz, 1H), 4.0 (s, 6H), 2.95-2.66 (bs, D<sub>2</sub>O exchangeable, 2H), 1.58-1.44 (m, 4H), 0.81-0.70 (m, 3H), 0.68-0.64 (m, 3H); IR (KBr, cm<sup>-1</sup>): 3384 (bs, OH), 2930, 2874, 1620 (C=O), 1585, 1538; MS (CI, *i*-Butane) 449 (M<sup>+</sup>, 100 %); Elemental analysis found C, 72.36; H, 6.27; C<sub>27</sub>H<sub>28</sub>O<sub>6</sub> requires C, 72.30; H, 6.29 %.

**3-[5-(4-Nitrophenoxy)-2-((E)-4-nitrophenoxy)methyl)pent-1-en-3-ynyl]-2-phenylchromen-4-one (IVs)**

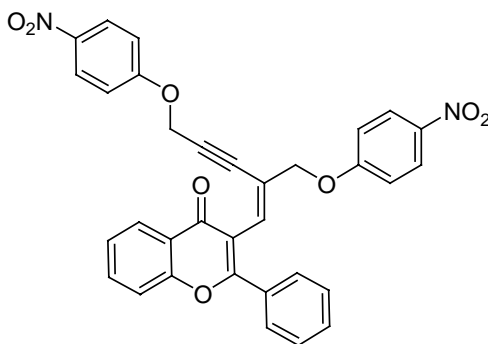

**IVs** was isolated a brown colored low melting solid;  $^1\text{H NMR}$  (400 MHz,  $\text{CDCl}_3$ )  $\delta$  8.19 (t,  $J = 6.9$  Hz, 4H), 7.88 (d,  $J = 5.1$  Hz, 2H), 7.57-7.55 (m, 2H), 7.48 (d,  $J = 6.2$  Hz, 2H) 7.4-7.37 (m, 3H), 6.94 (t,  $J = 4.8$  Hz, 2H), 6.89 (s, 1H), 6.81 (d,  $J = 4.8$  Hz, 2H), 4.73 (s, 2H), 4.68 (s, 2H); IR (KBr,  $\text{cm}^{-1}$ ) 1644 (C=O);  $m/z$  (CI, i-Butane) 574 ( $\text{M}^+$ , 100%); HPLC: 97.1%, Alltima c18 (53 x 7 mm), mobile phase 0.01M  $\text{KH}_2\text{PO}_4$ :  $\text{CH}_3\text{CN}$  70:30, (T/%B) 0/60, 1/60, 14/85, 17/85, 19/60, 20/60, 2.5 mL/min, 220 nm, retention time 6.2 min; Elemental analysis found C, 68.94; H, 3.88; N, 4.50;  $\text{C}_{33}\text{H}_{22}\text{N}_2\text{O}_8$  requires C, 68.99; H, 3.86; N, 4.88 %.

### General procedure for the preparation of **III**:

A mixture of **I** (2 mmol),  $(\text{PPh}_3)_2\text{PdCl}_2$  (0.08 mmol),  $\text{CuI}$  (0.10 mmol) and triethylamine (16 mmol) in DMF (4 mL) was stirred at 25 °C for 10 min under a nitrogen atmosphere. The acetylenic compound **II** (4 mmol) was added slowly to the mixture with with stirring. The reaction mixture was stirred at 25 °C for 10-15 h The mixture was poured into cold 2N HCl solution with stirring and filtered (if solid was separated) or extracted with EtOAc (3 x 200 mL). Combined organic layers were washed with cold water (2 x 100 mL), dried over  $\text{Na}_2\text{SO}_4$ , filtered and concentrated under vacuum. The residue was purified by column chromatography (petroleum ether-EtOAc) to afford the desired product.

### 3-(3-Hydroxy-3-methyl-1-butynyl)-2-phenyl thiochromen-4-one (**IIIa**)

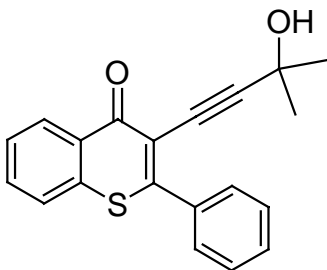

**IIIa** was isolated as brown gum;  $^1\text{H NMR}$  (200 MHz,  $\text{CDCl}_3$ ): 8.56 (d,  $J = 7.3$  Hz, 1H), 7.69-7.47 (m, 8H), 3.09-2.83 (bs,  $\text{D}_2\text{O}$  exchangeable, 1H), 1.43 (s, 6H); IR (Neat,  $\text{cm}^{-1}$ ): 3378 (bs, OH), 2980, 1614 (C=O); MS (CI, i-Butane): 321 ( $\text{M}^+$ , 30 %), 303 (100 %); Elemental analysis found C, 74.67; H, 5.00;  $\text{C}_{20}\text{H}_{16}\text{O}_2\text{S}$  requires C, 74.97; H, 5.03 %.

### 3-(Hydroxy-1-butynyl)-2-phenyl thiochromen-4-one (IIIb)

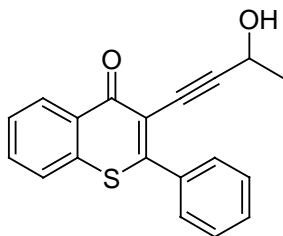

**IIIb** was isolated as semi solid;  $^1\text{H NMR}$  (200 MHz,  $\text{CDCl}_3$ ): 8.57 (d,  $J = 7.3$  Hz, 1H), 7.70-7.45 (m, 8H), 4.48 (m, 1H), 2.87 (bs,  $\text{D}_2\text{O}$  exchangeable, 1H), 1.40 (d,  $J = 6.4$  Hz, 3H); IR (Neat,  $\text{cm}^{-1}$ ): 3378 (bs, OH), 2980, 1614 ( $\text{C}=\text{O}$ ); MS (CI, i-Butane): 307 ( $\text{M}+1$ , 100 %); Elemental analysis found C, 74.53; H, 4.60;  $\text{C}_{19}\text{H}_{14}\text{O}_2\text{S}$  requires C, 74.48; H, 4.61 %.

### 3-(3-Hydroxy-1-propynyl)-2-phenyl thiochromen-4-one (IIIc)

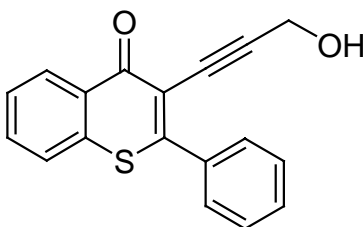

**IIIc** was isolated as brown semi solid;  $^1\text{H NMR}$  (200 MHz,  $\text{CDCl}_3$ ): 8.58 (d,  $J = 7.8$  Hz, 1H), 7.71-7.45 (m, 8H), 4.36 (s, 2H), 2.06 (bs,  $\text{D}_2\text{O}$  exchangeable, 1H); IR (Neat,  $\text{cm}^{-1}$ ): 3384 (bs, OH), 2925, 2223 (w,  $-\text{C}\equiv\text{C}-$ ), 1612 ( $\text{C}=\text{O}$ ); MS (CI, i-Butane): 293 ( $\text{M}+1$ , 100%); Elemental analysis found C, 73.99; H, 4.13;  $\text{C}_{18}\text{H}_{12}\text{O}_2\text{S}$  requires C, 73.95; H, 4.14 %.

### 3-(4-Hydroxy-1-butynyl)-2-phenyl thiochromen-4-one (III d)

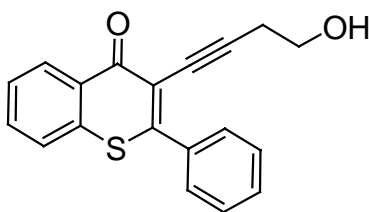

**III<sub>d</sub>** was isolated as light brown solid, DSC: 277.8 °C; <sup>1</sup>H NMR (200 MHz, CDCl<sub>3</sub>): 8.59 (d, *J* = 7.3 Hz, 1H), 7.70-7.52 (m, 8H), 3.78-8.71 (m, 2H), 2.62-2.5 (m, 2H), 2.31 (bs, D<sub>2</sub>O exchangeable, 1H); IR (Neat, cm<sup>-1</sup>): 3385 (bs, OH), 2929, 2225 (w, -C≡C-), 1612 (C=O); MS (CI, i-Butane): 307 (M+1, 100%); Elemental analysis found C, 74.58; H, 4.60; C<sub>19</sub>H<sub>14</sub>O<sub>2</sub>S requires C, 74.48; H, 4.61 %.

### 3-(3-Hydroxy-1-pentynyl)-2-phenyl thiochromen-4-one (III<sub>e</sub>)

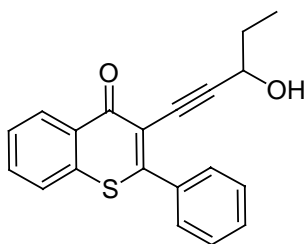

**III<sub>e</sub>** was isolated as light brown solid; <sup>1</sup>H NMR (200 MHz, CDCl<sub>3</sub>) 8.59 (d, *J* = 7.3 Hz, 1H), 7.70-7.52 (m, 8H), 4.6 (m, 1H), 2.49 (bs, D<sub>2</sub>O exchangeable, 1H), 1.85 (m, 2H), 1.1 (t, *J* = 7.0 Hz, 3H); IR (KBr, cm<sup>-1</sup>) 3410 (bs, OH), 2223 (w, -C≡C-), 1612 (C=O); MS (CI, i-Butane) 320 (M<sup>+</sup>, 100); Elemental analysis found C, 74.91; H, 5.05; C<sub>20</sub>H<sub>16</sub>O<sub>2</sub>S requires C, 74.97; H, 5.03 %.

### 3-(3-Hydroxy-3-phenyl-1-propynyl)-2-phenyl thiochromen-4-one (III<sub>f</sub>)

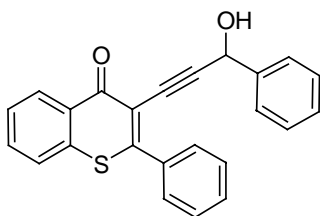

**III<sub>f</sub>** was isolated as brown solid; DSC 229.9 °C; <sup>1</sup>H NMR (200 MHz, CDCl<sub>3</sub>): 8.55 (d, *J* = 7.8 Hz, 1H), 7.63-7.02 (m, 13H), 5.56 (s, 1H), 2.23-1.89 (bs, D<sub>2</sub>O exchangeable, 1H); IR (KBr, cm<sup>-1</sup>): 3405 (bs, OH), 2924, 2186 (w, -C≡C-), 1608 (C=O), 1587; MS (CI, i-Butane): 369 (M+1, 100 %); Elemental analysis found C, 78.35; H, 4.37; C<sub>24</sub>H<sub>16</sub>O<sub>2</sub>S requires C, 78.24; H, 4.38 %.

### 4-[3-(4-Oxo-2-phenyl-4H-thiophen-3-yl)-2-propynyloxy] benzaldehyde (III<sub>g</sub>)



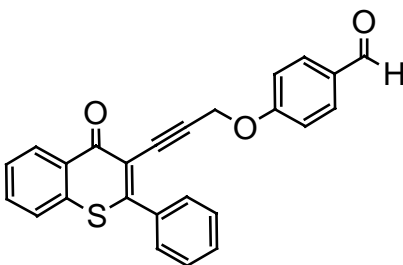

**IIIg** was isolated as pale yellow solid; DSC: 181.4 °C,  $^1\text{H NMR}$  (200 MHz,  $\text{CDCl}_3$ ): 9.91 (s, 1H), 8.58 (d,  $J = 8.1$  Hz, 1H), 7.79-7.75 (m, 3H), 7.66-7.49 (m, 3H), 7.40-7.31 (m, 3H), 7.04-6.94 (m, 3H), 4.85 (s, 2H); IR (Neat,  $\text{cm}^{-1}$ ): 2739, 2223 ( $-\text{C}\equiv\text{C}-$ ), 1690 ( $\text{H}-\text{C}=\text{O}$ ); MS (CI, *i*-Butane): 397.0 ( $\text{M}+1$ , 100%); Elemental analysis found C, 75.70; H, 4.10;  $\text{C}_{25}\text{H}_{16}\text{O}_3\text{S}$  requires C, 75.74; H, 4.07 %.

**3-[3-(4-Methoxy phenoxy)prop-1-ynyl]-2-phenyl thiochromen-4-one (IIIh):**

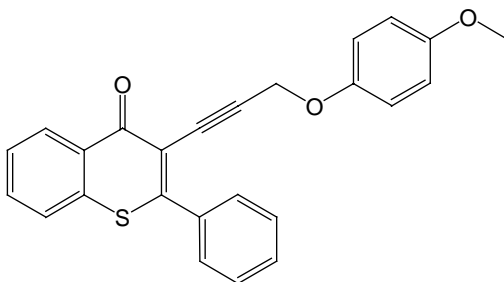

**IIIh** was isolated as a light brown color solid, mp 155-157 °C, DSC 156.5 °C;  $^1\text{H NMR}$  (200 MHz,  $\text{CDCl}_3$ )  $\delta$  8.57 (d,  $J = 6.9$  Hz, 1H), 7.63-7.52 (m, 5H), 7.47-7.30 (m, 3H), 6.83-6.73 (m, 4H), 4.78 (s, 2H), 3.77 (s, 3H); IR (KBr,  $\text{cm}^{-1}$ ) 1621 ( $\text{C}=\text{O}$ );  $m/z$  (CI, *i*-Butane) 398 ( $\text{M}^+$ , 100%);  $^{13}\text{C NMR}$  (50 MHz,  $\text{CDCl}_3$ )  $\delta$  178.6, 156.7, 154.1, 151.9, 136.1, 135.9, 131.7, 130.3, 129.9, 129.2, 128.7 (2C), 128.3, 127.9, 125.8 (2C), 117.9, 115.9 (2C), 114.4 (2C), 92.2, 81.5, 57.2, 55.6; VU (MeOH, nm) 356, 279.5, 228, 204; HPLC: 98.8%, Alltima 3C18 (53 x 7 mm), mobile phase 0.01M  $\text{KH}_2\text{PO}_4$ :  $\text{CH}_3\text{CN}$  70:30, (T/%B) 0/50, 1/50, 7/80, 16/80, 18/50, 20/50, 2.5 mL/min, 210 nm, retention time 6.2 min, Elemental analysis found C, 75.41; H, 4.53;  $\text{C}_{25}\text{H}_{18}\text{O}_3\text{S}$  requires C, 75.35; H, 4.55 %.

**6-Chloro-3-[3-(4-nitro phenoxy)prop-1-ynyl]-2-phenyl thiochromen-4-one (IIIi)**

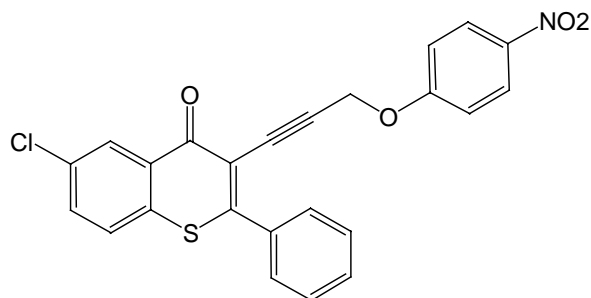

**IIIi** was isolated as light brown solid, mp 211-213 °C;  $^1\text{H NMR}$  (400 MHz,  $\text{CDCl}_3$ )  $\delta$  8.53 (s, 1H), 8.10 (d,  $J = 3.5$  Hz, 2H), 7.61 (d,  $J = 6.5$  Hz, 1H), 7.53 (t,  $J = 4.6$  Hz, 3H), 7.42 (t,  $J = 3.5$  Hz, 1H), 7.33 (t,  $J = 6.2$  Hz, 2H), 6.86 (d,  $J = 3.5$  Hz, 2H), 4.92 (s, 2H); IR (KBr,  $\text{cm}^{-1}$ ) 1625 (C=O); m/z (CI, i-Butane) 448 ( $\text{M}^+$ , 100%); VU (MeOH, nm) 356.5, 287.5; HPLC: 99.8%, Alltima C18 (53 x 7 mm), mobile phase 0.01M  $\text{KH}_2\text{PO}_4$ :  $\text{CH}_3\text{CN}$  70:30, (T/%B) 0/40, 1/40, 12/80, 16/80, 18/40, 20/40, 2.5 mL/min, 284 nm, retention time 11.8 min.; Elemental analysis found C, 64.46; H, 3.14; N, 3.10;  $\text{C}_{24}\text{H}_{14}\text{ClO}_4\text{S}$  requires C, 64.36; H, 3.15; N, 3.13 %.

**7-Chloro-3-[3-(2-chloro phenoxy)prop-1-ynyl]-2-phenyl thiocromen-4-one (IIIj):**

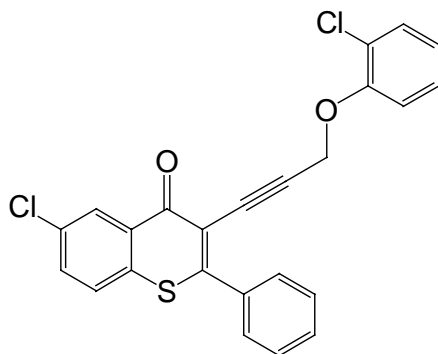

**IIIo** was isolated as light brown solid, mp 147-149 °C,  $^1\text{H NMR}$  (400 MHz,  $\text{CDCl}_3$ )  $\delta$  8.54 (s, 1H), 7.60 (d,  $J = 6.2$  Hz, 1H), 7.54 (t,  $J = 5.9$  Hz, 3H), 7.41 (t,  $J = 4.0$  Hz, 1H), 7.33-7.29 (m, 3H), 7.11 (t,  $J = 5.9$  Hz, 1H), 6.94-6.88 (m, 2H), 4.91 (s, 2H); IR (KBr,  $\text{cm}^{-1}$ ) 1616 (C=O); m/z (CI, i-Butane) 437 ( $\text{M}^+$ , 100%);  $^{13}\text{C NMR}$  (200 MHz,  $\text{CDCl}_3$ )  $\delta$  177.6, 157.1, 153.2, 135.5, 134.6, 134.4, 132.3, 131.1, 130.7, 130.2, 128.8, 128.6 (2C), 128.5, 127.5 (2C), 127.4, 122.9, 121.9, 117.9, 114.1, 91.6, 82.1, 57.3; VU (MeOH, nm) 349.54, 255, 216.5; HPLC: 98.4%, symmetry shield (250 x 4.6 mm), mobile phase 0.01M  $\text{KH}_2\text{PO}_4$  (pH-7.0):  $\text{CH}_3\text{CN}$  (70:30), (T/%B) 0/75, 5/75, 20/85, 30/85, 35/70, 40/70, 1.0

mL/min, 210 nm, retention time 19.4 min, Elemental analysis found C, 65.71; H, 3.25;  $C_{24}H_{14}Cl_2O_2S$  requires C, 65.91; H, 3.23 %.

**Biological assay:**

Compounds synthesized above were screened against 9 cell line panel for their in vitro anticancer activity using cell growth assay.

Cell growth assay: Exponentially growing cells were seeded (10000 cells / well) in 96-well. Cell culture plates were incubated with different concentrations of test compounds at 37 °C in a 5 % CO<sub>2</sub> incubator. After 48 hours, cell were fixed by adding ice-cold 50 % tri chloro acetic acid (TCA), washed with distilled water and stained with SRB solution. The plates were washed with 1 % acetic acid, the bound SRB stain was solubilized with 10 mM tris buffer, and the optical densities were read on a spectro photometric plate read at a single wavelength of 515 nm. The percentage growths were calculated and the GI<sub>50</sub> values were interpolated from the growth curves.

\*Cytotoxicity GI<sub>50</sub> values are the concentrations corresponding to 50 % growth inhibition.
